# Supplementary material for: Chronodisruption and Loss of Melatonin Rhythm, Associated with Alterations in Daily Motor Activity and Mitochondrial Dynamics in Parkinsonian Zebrafish, Are Corrected by Melatonin Treatment
Source: MDPI journal article supplement (doi:10.3390/antiox12040954), 2023-04-18
Supplement: s1 [file s1]

**Table S1.** Cosinor analysis

| Transcript      | Group                 | p      | PR     | Acrophase (hr)      | Mesor               | Amplitude            |
|-----------------|-----------------------|--------|--------|---------------------|---------------------|----------------------|
| <i>bmal1</i>    | Control               | 0,0013 | 47,04% | 18,87 (16,93-20,73) | 0,835 (0,531-1,14)  | 0,892 (0,463-1,32)   |
|                 | aMT                   | 0,0129 | 33,95% | 20,80 (18,20-23,47) | 0,586 (0,409-0,762) | 0,394 (0,145-0,643)  |
|                 | MPTP                  | 0,2129 | 13,70% | 16,80 (12,53-21,13) | 2,86 (1,83-3,89)    | 1,28 (-0,179-2,74)   |
|                 | MPTP+aMT <sub>2</sub> | 0,0000 | 68,64% | 20,07 (18,87-21,20) | 1,07 (0,823-1,32)   | 1,15 (0,795-1,50)    |
|                 | MPTP+aMT <sub>5</sub> | 0,0063 | 38,32% | 21,47 (19,13-23,80) | 0,676 (0,491-0,861) | 0,454 (0,193-0,716)  |
| <i>clock</i>    | Control               | 0,0041 | 40,81% | 3,01 (0,81-5,22)    | 1,03 (0,550-1,51)   | 1,24 (0,561-1,91)    |
|                 | aMT                   | 0,0033 | 42,04% | 2,25 (0,11-4,40)    | 1,10 (0,722-1,49)   | 1,01 (0,473-1,55)    |
|                 | MPTP                  | 0,7323 | 2,92%  | 18,47 (15,33-21,60) | 2,26 (1,56-2,96)    | 0,379 (-0,611-1,37)  |
|                 | MPTP+aMT <sub>2</sub> | 0,0263 | 29,28% | 2,03 (0,96-5,02)    | 1,61 (0,980-2,24)   | 1,26 (0,371-2,15)    |
|                 | MPTP+aMT <sub>5</sub> | 0,0013 | 46,78% | 0,62 (-2,55-1,31)   | 0,872 (0,663-1,08)  | 0,610 (0,315-0,906)  |
| <i>per2</i>     | Control               | 0,0018 | 45,08% | 13,87 (11,87-15,87) | 0,558 (0,331-0,786) | 0,643 (0,321-0,965)  |
|                 | aMT                   | 0,0195 | 31,28% | 16,00 (13,13-18,80) | 0,677 (0,400-0,953) | 0,581 (0,190-0,972)  |
|                 | MPTP                  | 0,0083 | 36,64% | 10,60 (8,20-13,07)  | 0,801 (0,560-1,04)  | 0,571 (0,230-0,911)  |
|                 | MPTP+aMT <sub>2</sub> | 0,0019 | 44,88% | 15,33 (13,27-17,33) | 0,780 (0,539-1,02)  | 0,680 (0,338-1,02)   |
|                 | MPTP+aMT <sub>5</sub> | 0,0141 | 33,36% | 15,80 (13,13-18,47) | 0,616 (0,404-0,827) | 0,467 (0,168-0,767)  |
| <i>cry1</i>     | Control               | 0,0256 | 29,46% | 17,07 (14,07-20,00) | 0,455 (0,265-0,646) | 0,384 (0,114-0,653)  |
|                 | aMT                   | 0,0291 | 28,59% | 20,47 (17,40-23,53) | 0,446 (0,296-0,597) | 0,298 (0,0841-0,511) |
|                 | MPTP                  | 0,0493 | 24,92% | 13,80 (10,33-17,27) | 0,394 (0,279-0,508) | 0,205 (0,0436-0,367) |
|                 | MPTP+aMT <sub>2</sub> | 0,0044 | 40,31% | 14,80 (12,53-17,00) | 0,720 (0,555-0,886) | 0,423 (0,190-0,657)  |
|                 | MPTP+aMT <sub>5</sub> | 0,0254 | 29,51% | 20,60 (17,60-23,53) | 0,556 (0,349-0,763) | 0,418 (0,125-0,711)  |
| <i>rorα</i>     | Control               | 0,0042 | 40,63% | 5,41 (3,19-7,60)    | 1,01 (0,568-1,46)   | 1,15 (0,520-1,79)    |
|                 | aMT                   | 0,0017 | 45,45% | 4,85 (2,87-6,87)    | 1,60 (0,912-2,30)   | 1,97 (0,990-2,95)    |
|                 | MPTP                  | 0,1753 | 15,28% | 13,93 (9,27-18,67)  | 1,38 (0,961-1,80)   | 0,555 (-0,0381-1,15) |
|                 | MPTP+aMT <sub>2</sub> | 0,0331 | 27,72% | 5,11 (1,97-8,27)    | 3,85 (2,31-5,38)    | 2,96 (0,792- 5,14)   |
|                 | MPTP+aMT <sub>5</sub> | 0,0254 | 29,51% | 5,59 (2,53-8,67)    | 2,37 (0,945-3,79)   | 2,78 (0,830-4,74)    |
| <i>rev-erba</i> | Control               | 0,0005 | 51,14% | 7,80 (6,05-9,53)    | 2,48 (1,30-3,66)    | 3,77 (2,10-5,44)     |
|                 | aMT                   | 0,0120 | 34,37% | 6,25 (3,66-8,87)    | 5,53 (1,39-9,68)    | 9,35 (3,49-15,2)     |
|                 | MPTP                  | 0,0040 | 40,91% | 8,27 (6,05-10,47)   | 1,40 (0,966-1,84)   | 1,14 (0,516-1,75)    |
|                 | MPTP+aMT <sub>2</sub> | 0,0243 | 29,81% | 8,47 (5,62-11,33)   | 6,73 (2,73-10,7)    | 8,32 (2,50-14,1)     |
|                 | MPTP+aMT <sub>5</sub> | 0,0251 | 29,59% | 5,93 (2,97-8,87)    | 4,55 (0,820-8,29)   | 7,54 (2,26-12,8)     |
| <i>chrono</i>   | Control               | 0,0029 | 42,65% | 5,60 (3,39-7,80)    | 3,74 (2,36-5,13)    | 3,62 (1,72-5,53)     |
|                 | aMT                   | 0,0044 | 40,37% | 8,40 (6,15-10,60)   | 3,95 (2,24-5,66)    | 4,38 (1,97-6,80)     |
|                 | MPTP                  | 0,0003 | 54,61% | 7,80 (6,19-9,47)    | 5,12 (3,09-7,16)    | 6,96 (4,08-9,84)     |
|                 | MPTP+aMT <sub>2</sub> | 0,0266 | 29,22% | 9,60 (6,59-12,60)   | 6,22 (3,39-9,06)    | 5,68 (1,67-9,69)     |
|                 | MPTP+aMT <sub>5</sub> | 0,0170 | 32,18% | 7,60 (4,87-10,40)   | 3,48 (2,29-4,66)    | 2,55 (0,870-4,23)    |

**Table S2.1.** Transcript: *bmal1*. Post-hoc test: Tukey multiple comparison of the means

| Treatments                                     | P value |    |           |           |     |           |           |           |
|------------------------------------------------|---------|----|-----------|-----------|-----|-----------|-----------|-----------|
|                                                | 2h      | 5h | 8h        | 11h       | 14h | 17h       | 20h       | 23h       |
| Control vs aMT                                 | ns      | ns | ns        | ns        | ns  | ns        | P < 0.001 | ns        |
| Control vs MPTP                                | ns      | ns | P < 0.001 | P < 0.001 | ns  | P < 0.001 | ns        | P < 0.001 |
| Control vs MPTP+aMT <sub>2</sub>               | ns      | ns | ns        | ns        | ns  | ns        | ns        | ns        |
| Control vs MPTP+aMT <sub>5</sub>               | ns      | ns | ns        | ns        | ns  | P < 0.05  | P < 0.01  | ns        |
| aMT vs MPTP                                    | ns      | ns | P < 0.001 | P < 0.001 | ns  | P < 0.001 | ns        | P < 0.01  |
| aMT vs MPTP+aMT <sub>2</sub>                   | ns      | ns | ns        | ns        | ns  | ns        | P < 0.001 | ns        |
| aMT vs MPTP+aMT <sub>5</sub>                   | ns      | ns | ns        | ns        | ns  | ns        | ns        | ns        |
| MPTP vs MPTP+aMT <sub>2</sub>                  | ns      | ns | P < 0.001 | P < 0.001 | ns  | P < 0.001 | ns        | P < 0.05  |
| MPTP vs MPTP+aMT <sub>5</sub>                  | ns      | ns | P < 0.001 | P < 0.001 | ns  | P < 0.001 | ns        | ns        |
| MPTP+aMT <sub>2</sub> vs MPTP+aMT <sub>5</sub> | ns      | ns | ns        | ns        | ns  | P < 0.05  | P < 0.01  | ns        |

**Table S2.2.** Transcript: *clock*. Post-hoc test: Tukey multiple comparison of the means

| Treatments                                     | P value   |           |    |          |          |           |           |          |
|------------------------------------------------|-----------|-----------|----|----------|----------|-----------|-----------|----------|
|                                                | 2h        | 5h        | 8h | 11h      | 14h      | 17h       | 20h       | 23h      |
| Control vs aMT                                 | P < 0.001 | ns        | ns | ns       | ns       | ns        | ns        | P < 0.05 |
| Control vs MPTP                                | ns        | ns        | ns | P < 0.01 | P < 0.05 | P < 0.001 | P < 0.001 | ns       |
| Control vs MPTP+aMT <sub>2</sub>               | P < 0.05  | P < 0.05  | ns | ns       | ns       | ns        | ns        | ns       |
| Control vs MPTP+aMT <sub>5</sub>               | P < 0.05  | ns        | ns | ns       | ns       | ns        | ns        | ns       |
| aMT vs MPTP                                    | P < 0.05  | ns        | ns | P < 0.01 | P < 0.01 | P < 0.001 | P < 0.001 | ns       |
| aMT vs MPTP+aMT <sub>2</sub>                   | ns        | ns        | ns | ns       | ns       | ns        | ns        | ns       |
| aMT vs MPTP+aMT <sub>5</sub>                   | ns        | ns        | ns | ns       | ns       | ns        | ns        | ns       |
| MPTP vs MPTP+aMT <sub>2</sub>                  | ns        | P < 0.01  | ns | P < 0.01 | P < 0.05 | P < 0.001 | P < 0.05  | ns       |
| MPTP vs MPTP+aMT <sub>5</sub>                  | ns        | ns        | ns | P < 0.01 | P < 0.01 | P < 0.001 | P < 0.001 | ns       |
| MPTP+aMT <sub>2</sub> vs MPTP+aMT <sub>5</sub> | ns        | P < 0.001 | ns | ns       | ns       | ns        | ns        | ns       |



**Table S2.5.** Transcript: *rora*. Post-hoc test: Tukey multiple comparison of the means

| Treatments                                     | P value   |           |    |           |           |           |     |     |
|------------------------------------------------|-----------|-----------|----|-----------|-----------|-----------|-----|-----|
|                                                | 2h        | 5h        | 8h | 11h       | 14h       | 17h       | 20h | 23h |
| Control vs aMT                                 | ns        | P < 0.001 | ns | ns        | ns        | ns        | ns  | ns  |
| Control vs MPTP                                | ns        | ns        | ns | ns        | P < 0.001 | ns        | ns  | ns  |
| Control vs MPTP+aMT <sub>2</sub>               | P < 0.001 | P < 0.001 | ns | P < 0.001 | ns        | P < 0.001 | ns  | ns  |
| Control vs MPTP+aMT <sub>5</sub>               | ns        | P < 0.001 | ns | ns        | ns        | ns        | ns  | ns  |
| aMT vs MPTP                                    | ns        | P < 0.001 | ns | ns        | P < 0.01  | ns        | ns  | ns  |
| aMT vs MPTP+aMT <sub>2</sub>                   | P < 0.001 | P < 0.001 | ns | P < 0.001 | ns        | P < 0.001 | ns  | ns  |
| aMT vs MPTP+aMT <sub>5</sub>                   | ns        | P < 0.001 | ns | ns        | ns        | ns        | ns  | ns  |
| MPTP vs MPTP+aMT <sub>2</sub>                  | P < 0.001 | P < 0.001 | ns | P < 0.05  | P < 0.05  | P < 0.001 | ns  | ns  |
| MPTP vs MPTP+aMT <sub>5</sub>                  | ns        | P < 0.001 | ns | ns        | P < 0.001 | ns        | ns  | ns  |
| MPTP+aMT <sub>2</sub> vs MPTP+aMT <sub>5</sub> | P < 0.001 | ns        | ns | P < 0.001 | ns        | P < 0.001 | ns  | ns  |

**Table S2.6.** Transcript: *rev-erba*. Post-hoc test: Tukey multiple comparison of the means

| Treatments                                     | P value |           |           |           |     |     |     |     |
|------------------------------------------------|---------|-----------|-----------|-----------|-----|-----|-----|-----|
|                                                | 2h      | 5h        | 8h        | 11h       | 14h | 17h | 20h | 23h |
| Control vs aMT                                 | ns      | P < 0.001 | P < 0.001 | ns        | ns  | ns  | ns  | ns  |
| Control vs MPTP                                | ns      | ns        | P < 0.001 | ns        | ns  | ns  | ns  | ns  |
| Control vs MPTP+aMT <sub>2</sub>               | ns      | P < 0.001 | P < 0.001 | P < 0.001 | ns  | ns  | ns  | ns  |
| Control vs MPTP+aMT <sub>5</sub>               | ns      | P < 0.001 | P < 0.001 | ns        | ns  | ns  | ns  | ns  |
| aMT vs MPTP                                    | ns      | P < 0.001 | ns        | ns        | ns  | ns  | ns  | ns  |
| aMT vs MPTP+aMT <sub>2</sub>                   | ns      | P < 0.001 | ns        | P < 0.01  | ns  | ns  | ns  | ns  |
| aMT vs MPTP+aMT <sub>5</sub>                   | ns      | P < 0.001 | ns        | ns        | ns  | ns  | ns  | ns  |
| MPTP vs MPTP+aMT <sub>2</sub>                  | ns      | P < 0.001 | ns        | P < 0.001 | ns  | ns  | ns  | ns  |
| MPTP vs MPTP+aMT <sub>5</sub>                  | ns      | P < 0.001 | ns        | ns        | ns  | ns  | ns  | ns  |
| MPTP+aMT <sub>2</sub> vs MPTP+aMT <sub>5</sub> | ns      | ns        | ns        | P < 0.01  | ns  | ns  | ns  | ns  |

**Table S2.7.** Transcript: *chrono*. Post-hoc test: Tukey multiple comparison of the means

| Treatments                                     | P value   |           |           |           |     |     |     |          |
|------------------------------------------------|-----------|-----------|-----------|-----------|-----|-----|-----|----------|
|                                                | 2h        | 5h        | 8h        | 11h       | 14h | 17h | 20h | 23h      |
| Control vs aMT                                 | P < 0.01  | ns        | P < 0.001 | ns        | ns  | ns  | ns  | ns       |
| Control vs MPTP                                | P < 0.05  | P < 0.05  | P < 0.001 | ns        | ns  | ns  | ns  | P < 0.05 |
| Control vs MPTP+aMT <sub>2</sub>               | P < 0.01  | P < 0.01  | P < 0.001 | P < 0.001 | ns  | ns  | ns  | ns       |
| Control vs MPTP+aMT <sub>5</sub>               | ns        | ns        | P < 0.001 | ns        | ns  | ns  | ns  | ns       |
| aMT vs MPTP                                    | P < 0.001 | P < 0.001 | ns        | P < 0.05  | ns  | ns  | ns  | P < 0.05 |
| aMT vs MPTP+aMT <sub>2</sub>                   | ns        | ns        | ns        | P < 0.001 | ns  | ns  | ns  | ns       |
| aMT vs MPTP+aMT <sub>5</sub>                   | ns        | P < 0.01  | ns        | ns        | ns  | ns  | ns  | ns       |
| MPTP vs MPTP+aMT <sub>2</sub>                  | P < 0.001 | P < 0.001 | ns        | P < 0.001 | ns  | ns  | ns  | ns       |
| MPTP vs MPTP+aMT <sub>5</sub>                  | P < 0.001 | ns        | ns        | P < 0.01  | ns  | ns  | ns  | ns       |
| MPTP+aMT <sub>2</sub> vs MPTP+aMT <sub>5</sub> | ns        | P < 0.001 | ns        | P < 0.001 | ns  | ns  | ns  | ns       |
